1 **EFFECT OF HEALTH EDUCATION IN THE CONTROL OF**  
2 **SCHISTOSOMIASIS IN DASS EMIRATE COUNCIL OF BAUCHI**  
3 **STATE, NIGERIA: AN INTERVENTION STUDY**

4 <sup>a</sup>Sunday Charles Adeyemo, <sup>b</sup>Gbadebo Jimoh Oyedeji, <sup>c</sup>James Atolagbe, <sup>c</sup>Oladunni Opeyemi,  
5 <sup>d</sup>Sunday Olanrewaju, <sup>e</sup>Calistus Akinleye, <sup>e</sup>Funsho Olagunju <sup>f</sup>Eniola Dorcas Olabode,  
6 <sup>g</sup>Abdulwaris Salisu Maleka

7 <sup>a</sup>Institut Superieur de Sante, Niamey, Niger Republic

8 [charlespatho@gmail.com](mailto:charlespatho@gmail.com)

9 <sup>b</sup>Department of Medical Microbiology and Parasitology, LAUTECH, Osogbo, Nigeria

10 [oyedejigbadebo@gmail.com](mailto:oyedejigbadebo@gmail.com)

11 <sup>c</sup>Public Health Department, Adeleke University, Ede, Nigeria

12 [jatolagbe@yahoo.com](mailto:jatolagbe@yahoo.com)

13 [opeyemi.oladunni@adelekeuniversity.edu.ng](mailto:opeyemi.oladunni@adelekeuniversity.edu.ng)

14 <sup>d</sup>Community Medicine Department, Osun State University, Osogbo, Nigeria

15 [sunday.olarewaju@uniosun.edu.ng](mailto:sunday.olarewaju@uniosun.edu.ng)

16 [callistus.akinleye@uniosun.edu.ng](mailto:callistus.akinleye@uniosun.edu.ng)

17

18 <sup>e</sup>Department of Paediatrics Medicine, Osun State University, Osogbo, Nigeria

19 [funso.olagunju@uniosun.edu.ng](mailto:funso.olagunju@uniosun.edu.ng)

20 <sup>f</sup>Department of Community Health, Obafemi Awolowo University, Ile-Ife, Nigeria

21 [oluwafemieniola.ed@gmail.com](mailto:oluwafemieniola.ed@gmail.com)

22 <sup>g</sup> Disease control and immunization unit, Bauchi State Primary Health Care Development  
23 Agency, Dass Emirate, Nigeria

24 [abdulwarismaleka1@gmail.com](mailto:abdulwarismaleka1@gmail.com)

25 **Corresponding author:**

26 Sunday Charles Adeyemo

27 Institut Superieur de Sante

28 +22796579435, [charlespatho@gmail.com](mailto:charlespatho@gmail.com)

29

## 30 **Abstract**

31 **Objective:** Schistosomiasis has been recognized by WHO as major contributor to mortality  
32 and morbidity particularly in Sub Sahara Africa where it is mostly prevalent. There is a lack  
33 of reliable data on the effectiveness of health education interventions in reducing the  
34 prevalence of Schistosomiasis in Bauchi State. Hence, the study assessed the prevalence of  
35 Schistosomiasis and the knowledge, attitude and practices of community members of Dass  
36 Emirate towards the prevention and control of Schistosomiasis before and after health  
37 education intervention.

38 **Results:** At pre-intervention, majority of the respondents 234 (66.9%) have been diagnosed,  
39 or have family members or community members who have been diagnosed with  
40 Schistosomiasis. Ninety-six (27.5%) of respondents have good knowledge about  
41 Schistosomiasis. 79 (22.6%) of the respondents strongly agree that they can confidently  
42 recognize symptoms of schistosomiasis. Only 91 (26.0%) strongly agreed to taking  
43 responsibilities for taking preventive measures. At post-intervention, the prevalence of  
44 Schistosomiasis dropped to 55.1%. This was statistically significant at  $p = 0.043$ . Knowledge  
45 about Schistosomiasis increased from 27.5% to 87.0% at post-intervention. This was  
46 statistically significant at  $p < 0.05$ . Regarding attitude and practices, good attitude and  
47 practices increased from 59.1% at pre-intervention 71.0% at post-intervention. However, this  
48 was not statistically significant ( $p > 0.05$ ).

49 **Keywords:** Schistosomiasis, infected water, eggs, health, education, knowledge, prevalence,  
50 intervention

## 51 **Introduction**

52 Schistosomiasis, commonly known as bilharzia, is a parasitic disease caused by  
53 trematode flatworms of Schistosoma. It is a major public health concern in many tropical and  
54 subtropical regions, affecting millions worldwide. The disease is transmitted through contact  
55 with fresh water contaminated with parasitic larvae, which penetrate human skin and mature  
56 in the blood vessels, leading to various clinical manifestations. [1] Globally, schistosomiasis  
57 is recognized as a significant contributor to morbidity and mortality, especially in sub-  
58 Saharan Africa. The World Health Organization (WHO) estimates that over 200 million  
59 people are infected with schistosomiasis worldwide, with most cases occurring in Africa. [2]  
60 The disease can lead to severe health complications, including liver and spleen enlargement,  
61 kidney damage, bladder cancer, and even death if left untreated. [3]

62 In a study on the challenges of controlling schistosomiasis through mass drug  
63 administration (MDA) campaigns were highlighted. While MDA has shown short-term  
64 benefits in reducing the prevalence and intensity of infection, the long-term impact remains  
65 uncertain. [4] The study emphasized the need for comprehensive strategies, including health  
66 education and improved sanitation, to achieve sustainable disease control. There is a lack of  
67 reliable data on the effectiveness of health education interventions in reducing the prevalence  
68 of Schistosomiasis in Bauchi State. This knowledge gap makes it difficult to design effective  
69 control programs and allocate resources efficiently. Therefore, this study aims to evaluate the  
70 effectiveness of health education as an intervention in controlling Schistosomiasis in Dass  
71 Emirate Council of Bauchi State.

72

## 73 **Methods**

74           The study employed a quasi-experimental design which involved pre-intervention  
75 data collection, intervention and post-intervention data collection. The intervention was a  
76 health education intervention programme which was designed with training manual adapted  
77 from Federal Ministry of Health manual. The training targeted major stakeholders including  
78 school pupils, market people, religious leaders, farmers and herders in 10 communities of  
79 Dass Emirate of Bauchi where schistosomiasis are mostly prevalent. Self-administered semi-  
80 structured questionnaire was used to collect baseline data and post intervention data. The  
81 Fisher's formula ( $n=z^2pq/d^2$ ) was used to estimate a total of 450 respondents. Multistage  
82 sampling technique was used to recruit respondents. The study population of this study  
83 encompassed residents of the Dass Emirate Council. The data collected were analyzed with  
84 SPSS software package version 25 and p - value less than 0.05 was taken as statistically  
85 significant. Descriptive statistics were done for all variables. Comparison of variables at pre-  
86 and post-intervention was done using chi-square as a test of association.

## 87 **Results**

88           At pre-intervention, Majority of the respondents 234 (66.9%) have been diagnosed, or  
89 have family members or community members who have been diagnosed with  
90 Schistosomiasis. Ninety-five (27.1%) reported that Schistosomiasis is very common in their  
91 community, 131 (37.5%) reported that Schistosomiasis is somewhat common in their  
92 community, 43 (12.3%) reported that Schistosomiasis is rare in their community while 81  
93 (23.1%) are unsure about the commonness of Schistosomiasis in their community. More than  
94 half, (207, 59.1%) reported that someone in their community has been diagnosed with  
95 Schistosomiasis.

96 About knowledge of Schistosomiasis at pre-intervention, overall good knowledge was  
97 27.5%. Majority (310, 88.6%) of the respondents have heard about Schistosomiasis. Majority  
98 of the respondents 200 (64.5%) heard about Schistosomiasis from health care workers. One  
99 hundred and twenty-eight (41.3%) of the respondents reported abdominal pain as a common  
100 symptom of Schistosomiasis, 36 (11.6%) respondents reported blood in urine or stool as a  
101 common symptom of Schistosomiasis, 71 (22.9%) reported fatigue as a common symptom of  
102 Schistosomiasis, while 85 (27.4%) respondents reported weight loss as a common symptom  
103 of Schistosomiasis. About transmission of Schistosomiasis, 83 (26.8%) reported that it can be  
104 transmitted through infected water sources, 140 (45.2%) reported that it can be transmitted  
105 through mosquito bites, 75 (24.2%) reported that it can be transmitted through contaminated  
106 food while 52 (16.8%) reported that it can be transmitted through human contact. Ninety-one  
107 (29.4%) reported that Schistosomiasis is preventable, while 140 (45.2%) reported that it is not  
108 preventable and 79 (25.4%) do not know. On the preventive measures of Schistosomiasis, out  
109 of 91 that said it can be prevented, 20 (30.0%) reported that it can be prevented by avoiding  
110 contact with contaminated water, 31 (34.1%) reported that it can be prevented by boiling or  
111 treating water before use, 29 (31.9%) reported that it can be prevented by proper sanitation  
112 and hygiene practices while 10 (11.0%) reported that it can be prevented by use of  
113 insecticide-treated nets.

114 About attitude and practices towards the prevention of schistosomiasis, at pre-  
115 intervention, 79 (22.6%) of the respondents strongly agree that they can confidently  
116 recognize symptoms of schistosomiasis. Fifty-five (15.7%) strongly agree that there is  
117 community engagement in efforts towards prevention of Schistosomiasis. Only 91 (26.0%)  
118 strongly agreed to taking responsibilities for taking preventive measures and only 23 (6.6%)  
119 strongly agreed that they discuss prevention of Schistosomiasis with their family. However,  
120 118 (33.7%) agreed that their actions can reduce the risk of Schistosomiasis. One hundred

121 and twenty (34.3%) avoided contact with contaminated water to prevent and control  
122 Schistosomiasis, 51 (14.6%) boiled or treated water to prevent and control Schistosomiasis,  
123 129 (36.8%) practiced proper hygiene and sanitation to prevent and control Schistosomiasis  
124 while 50 (14.3%) used insect treated nets to prevent and control Schistosomiasis.

125 At post-intervention, the prevalence reduced to 190 (55.1%) and this was statistically  
126 significant at  $p=0.043$ . (Figure 1) Knowledge of schistosomiasis increased to 87.0% at post-  
127 intervention and this was statistically significant at  $p < 0.001$ . (Figure 2) About attitude and  
128 practices towards schistosomiasis prevention and control, 126 (36.5%) of the respondents  
129 strongly agree that they can confidently recognize symptoms of schistosomiasis. This  
130 difference was not statistically significant at  $p=0.045$ . Eighty-eight (25.5%) strongly agree  
131 that there is community engagement in efforts towards prevention of Schistosomiasis.  
132 However, this difference was not statistically significant ( $p>0.05$ ). One hundred and eighteen  
133 (34.2%) strongly agreed to taking responsibilities for taking preventive measure. The  
134 difference is statistically significant at  $p = 0.035$ . One hundred and fifty-eight (45.8%) agreed  
135 that they discuss prevention of Schistosomiasis with their family. This difference was  
136 statistically significant at  $p=0.022$ . One hundred and twenty-four (35.9%) respondents  
137 strongly agreed that their actions can reduce the risk of Schistosomiasis. However, this was  
138 not statistically significant ( $p>0.05$ ). About actions taken to prevent schistosomiasis, 120  
139 (34.8%) reported avoiding contact with contaminated water, 51 (14.8%) reported boiling or  
140 treating water before use, 124 (35.9%) reported proper sanitation and hygiene practices and  
141 50 (14.5%) reported use of insecticide-treated nets. However, this difference was not  
142 statistically significant ( $p>0.05$ ) (Table 1)

143

144

145

146 **Table 1: Comparison of Attitude and Practices towards Schistosomiasis prevention and**  
 147 **control among respondents at pre-intervention and post-intervention**

| Attitude and practices towards prevention and control of Schistosomiasis | Frequency (%)    |                           | Statistics                                       |
|--------------------------------------------------------------------------|------------------|---------------------------|--------------------------------------------------|
|                                                                          | Baseline (n=350) | Post-intervention (n=345) |                                                  |
| <b>I can confidently recognize Schistosomiasis symptoms</b>              |                  |                           | $\chi^2 = 2.242$<br>df = 5<br><b>p = 0.045*</b>  |
| Strongly Disagree                                                        | 109 (31.1)       | 50 (20.4)                 |                                                  |
| Disagree                                                                 | 71(20.3)         | 51 (14.8)                 |                                                  |
| Neutral                                                                  | 55 (15.7)        | 49 (14.3)                 |                                                  |
| Agree                                                                    | 36 (10.3)        | 69 (20.0)                 |                                                  |
| Strongly agree                                                           | 79 (22.6)        | 126 (36.5)                |                                                  |
| <b>There is community engagement in prevention efforts</b>               |                  |                           | $\chi^2 = 13.698$<br>df = 5<br>p = 0.058         |
| Strongly disagree                                                        | 120 (34.3)       | 59 (17.1)                 |                                                  |
| Disagree                                                                 | 91 (26.0)        | 64 (18.6)                 |                                                  |
| Neutral                                                                  | 49 (14.0)        | 48 (13.9)                 |                                                  |
| Agree                                                                    | 35 (10.0)        | 86 (24.9)                 |                                                  |
| Strongly agree                                                           | 55 (15.7)        | 88 (25.5)                 |                                                  |
| <b>I take responsibility for taking preventive measures</b>              |                  |                           | $\chi^2 = 15.090$<br>df = 5<br><b>p = 0.035*</b> |
| Strongly disagree                                                        | 108 (30.9)       | 20 (5.8)                  |                                                  |
| Disagree                                                                 | 55 (15.7)        | 56 (16.2)                 |                                                  |
| Neutral                                                                  | 37 (10.5)        | 47 (13.6)                 |                                                  |
| Agree                                                                    | 59 (16.9)        | 104 (30.1)                |                                                  |
| Strongly agree                                                           | 91 (26.0)        | 118 (34.2)                |                                                  |
| <b>I have discussions about prevention with family</b>                   |                  |                           | $\chi^2 = 12.781$<br>df = 5<br><b>p = 0.022*</b> |
| Strongly disagree                                                        | 141 (40.2)       | 54 (15.7)                 |                                                  |
| Disagree                                                                 | 70 (20.0)        | 52 (15.1)                 |                                                  |
| Neutral                                                                  | 65 (18.6)        | 17 (4.9)                  |                                                  |
| Agree                                                                    | 51 (14.6)        | 158 (45.8)                |                                                  |
| Strongly agree                                                           | 23 (6.6)         | 64 (18.6)                 |                                                  |
| <b>I belief that my actions can reduce risk of Schistosomiasis</b>       |                  |                           | $\chi^2 = 18.889$<br>df = 5<br>p =0.055          |
| Strongly disagree                                                        | 90 (25.7)        | 51 (14.8)                 |                                                  |
| Disagree                                                                 | 45 (12.9)        | 53 (15.4)                 |                                                  |
| Neutral                                                                  | 36 (10.3)        | 40 (11.6)                 |                                                  |
| Agree                                                                    | 118(33.7)        | 77 (22.3)                 |                                                  |
| Strongly agree                                                           | 61 (17.4)        | 124 (35.9)                |                                                  |
| <b>Actions you/ family members has taken to prevent Schistosomiasis</b>  |                  |                           | $\chi^2 = 18.889$<br>df = 4<br>p =0.075          |
| Avoiding contact with contaminated water                                 | 80 (22.9)        | 120 (34.8)                |                                                  |
| Boiling or treating water before use                                     | 81 (23.1)        | 51 (14.8)                 |                                                  |
| Proper sanitation and hygiene practices                                  | 89 (25.4)        | 124 (35.9)                |                                                  |
| Use of insecticide-treated nets                                          | 100 (28.6)       | 50 (14.5)                 |                                                  |

148  $\chi^2$ = Chi-square, df= degree of freedom, p= p-value, \*= statistically significant

## 149 ***Discussion***

150           The prevalence of Schistosomiasis was high at baseline. More than 3 out of 5  
151 respondents have been diagnosed with Schistosomiasis. This can be attributed to the fact that  
152 two-fifth of the respondents are adolescents and are prone to activities that expose them to the  
153 disease. Also, more than four-fifth are rural dwellers which are prone to poor sanitation and  
154 hygiene practices. This is similar to a study who reported that children and adolescents are  
155 more prone to Schistosomiasis and poor sanitation is also linked with the disease. [5]

156           The Knowledge regarding Schistosomiasis was poor at baseline. Only about one-third  
157 had good knowledge about Schistosomiasis. More than four-fifth of the respondents have  
158 heard about Schistosomiasis and two-fifth of the respondents reported abdominal pain as a  
159 common symptom of Schistosomiasis. More than two-fifth reported that it can be transmitted  
160 through mosquito bites. One-third reported that Schistosomiasis is preventable, out of which  
161 one-third reported that it can be prevented by proper sanitation and hygiene practices. The  
162 poor knowledge can be attributed to low level of education among respondents. This is  
163 similar to the findings on the knowledge attitude and practices regarding rural communities in  
164 Kano State. [6]

165           The attitude and practices towards Schistosomiasis prevention and control was poor at  
166 baseline. One-third of the respondents reported that there was no community engagement in  
167 efforts towards prevention of Schistosomiasis. Less than one-third were taking  
168 responsibilities for taking preventive measures and only less than one-tenth of the  
169 respondents discuss prevention of Schistosomiasis with their family. However, slightly above  
170 one-third of the respondents agreed that some actions can reduce the risk of Schistosomiasis.  
171 In order to prevent and control schistosomiasis, slightly above one-third avoided contact with



172 contaminated water and practiced proper hygiene and sanitation. This reveals significant  
173 shifts in the community's perceptions and reported experiences with the disease.

174 At post-intervention, the prevalence of Schistosomiasis decreased significantly to  
175 slightly more than half, which was statistically significant at  $p=0.043$ . This could be  
176 attributed to heightened community awareness of Schistosomiasis as a result of health  
177 education, which aligns with research that suggests heightened awareness through health  
178 education can increase community concern thereby reducing prevalence of Schistosomiasis.  
179 [7]

180 At post-intervention, overall knowledge improved from less than one-third at baseline  
181 to fourth-fifth after health education intervention. This aligns with the findings which  
182 reported that improved symptom recognition was linked to effective health education,  
183 potentially leading to earlier disease detection and treatment. [8] The attitude and practices  
184 concerning Schistosomiasis control improved after the health education intervention. One-  
185 third of the respondents strongly agreed to taking responsibilities for taking preventive  
186 measures while more than two-fifth of the respondents agreed that they discuss prevention of  
187 Schistosomiasis with their family. A study by [9] supports this finding, suggesting that  
188 enhanced community engagement is often observed following targeted health education  
189 campaigns, which empower communities to take an active role in disease prevention. The  
190 role of family discussion in promoting health practices has also been well-documented, [7]  
191 and the result of this study echo the potential of family-based interventions to amplify health  
192 messages within a community. More than one-third of the respondents strongly agreed that  
193 some actions can reduce the risk of Schistosomiasis. This is indicative of an internalization of  
194 health education messages, where community members not only learn about preventive  
195 measures but also believe in their efficacy. This internal belief system is essential for  
196 sustained behavior change and has been cited in previous studies as a critical component of

197 health education success. [10] The increase in the items indicating Knowledge, Attitude and  
198 Practices may be attributed to an enhancement in disease detection and diagnosis efforts, a  
199 finding consistent with studies, that demonstrate improved identification of endemic diseases  
200 following concerted health interventions. [11] Similar patterns have also been noted in other  
201 literature, where increased awareness following educational interventions correlates with  
202 improved health behaviors. [12]

203 An essential aspect of the study's success was its culturally sensitive approach. By  
204 tailoring the intervention to fit the local cultural context and incorporating local beliefs and  
205 practices, the program achieved higher engagement and effectiveness. This approach is in  
206 line with the recommendations of [7], which emphasize the importance of cultural sensitivity  
207 in health education interventions.

208 The findings highlight the importance of health education interventions in improving  
209 knowledge, attitudes, and practices towards Schistosomiasis control. They underscore the  
210 need for addressing perceived barriers and emphasize the role of community engagement in  
211 Schistosomiasis prevention and control. The study recommends prioritizing formulation of  
212 comprehensive health policies that address Schistosomiasis within the broader context of  
213 public health and increased allocation of resources while encouraging partnership from  
214 stakeholders and participation from individuals in combatting schistosomiasis.

## 215 ***Acknowledgements***

216 The authors wish to acknowledge the respondents and the spouses of the authors for their  
217 understanding during the course of this study.

## 218 **References**

- 219 [1] Kokaliaris, C., Garba, A., Matuska, M., Bronzan, R. N., Colley, D. G., Dorkenoo, A. M.,  
220 and Vounatsou, P. (2022). Effect of preventive chemotherapy with praziquantel on  
221 schistosomiasis among school-aged children in sub-Saharan Africa: a spatiotemporal  
222 modelling study. *The Lancet Infectious Diseases*, 22(1), 136-149.
- 223 [2] World Health Organization (2019, April 17). *Schistosomiasis*. Who.int; World Health  
224 Organization: WHO. <https://www.who.int/news-room/fact-sheets/detail/schistosomiasis>.  
225 [Accessed 25th November 2022](#)
- 226 [3] Castro VN, Rodrigues JL, Cardoso DT, Resende SD, Magalhães FC, Souza DC, Requeijo  
227 MH, Negrão-Corrêa D and Geiger SM (2018) Systemic Cytokine and Chemokine Profiles in  
228 Individuals with *Schistosoma mansoni* Infection and Low Parasite Burden. *Front. Immunol.*  
229 9:2975. doi: 10.3389/fimmu.2018.02975
- 230 [4] Olveda, D. U., McManus, D., and Ross, A. (2016). Mass drug administration and the  
231 global control of schistosomiasis: successes, limitations and clinical outcomes. *Clinical*  
232 *Microbiology and Infection*, 22(6), 499-507.
- 233 [5] Karunamoorthi, K., Almalki, M.J. and Ghailan, K.Y., 2018. Schistosomiasis: A neglected  
234 tropical disease of poverty: A call for intersectoral mitigation strategies for better  
235 health. *Journal of Health Research and Reviews (In Developing Countries)*, 5(1), pp.1-12.
- 236 [6] Dawaki, S., Al-Mekhlafi, H. M., Ithoi, I., Ibrahim, J., Abdulsalam, A. M., Ahmed, A.,  
237 Sady, H., Nasr, N. A., & Atroosh, W. M. (2015). The Menace of Schistosomiasis in Nigeria:  
238 Knowledge, Attitude, and Practices Regarding Schistosomiasis among Rural Communities in  
239 Kano State. *PloS One*, 10 (11), e0143667. doi:10.1371/journal.pone.0143667.
- 240 [7] Wang, M., Han, X., Fang, H., Xu, C., Lin, X., Xia, S., Yu, W., He, J., Jiang, S., and Tao,  
241 H. (2018). Impact of Health Education on Knowledge and Behaviors toward Infectious

242 Diseases among Students in Gansu Province, China. *BioMed Research International*, 2018,  
243 1–12. <https://doi.org/10.1155/2018/6397340>.

244 [8] Sousa Pereira J, Neves H, Lobao C, Goncalves R, Santos M. The effectiveness of  
245 education on symptoms recognition in heart failure patients to manage self-care: a systematic  
246 review protocol. *Prof Inferm.* 2019 Jan-Mar;72(1):50-54. English. doi:  
247 10.7429/pi.2019.721050. PMID: 31162043.

248 [9] Sacolo H, Chimbari M, Kalinda C. Knowledge, attitudes and practices on Schistosomiasis  
249 in sub-Saharan Africa: a systematic review. *BMC Infect Dis.* 2018 Jan 18;18(1):46. doi:  
250 10.1186/s12879-017-2923-6. PMID: 29347919; PMCID: PMC5773048.

251 [10] Musuva RM, Awiti A, Omedo M, Ogutu M, Secor WE, Montgomery SP, Alaii J,  
252 Mwinzi PN. Community knowledge, attitudes and practices on schistosomiasis in western  
253 Kenya--the SCORE Project. *Am J Trop Med Hyg.* 2014 Apr;90(4):646-52. doi:  
254 10.4269/ajtmh.13-0488. Epub 2014 Feb 17. PMID: 24534810; PMCID: PMC3973508.

255 [11] Kong, S., Qin, Z., Sun, J., Cao, Y., Wang, L., & Guan, W. (2020). The impact of a rural  
256 health promotion program on knowledge and practice of preventive schistosomiasis and  
257 intestinal parasitic infections in communities at high risk of snail-borne diseases in rural  
258 China. *Journal of Infection and Public Health*, 13 (8), 1164–1171.

259 [12] Gazzinelli Maria Flávia, Lucas Lobato, Gisele Andrade, Leonardo Ferreira Matoso,  
260 David J. Diemert, Andréa Gazzinelli. Improving the understanding of schistosomiasis among  
261 adolescents in endemic areas in Brazil: A comparison of educational methods, Patient  
262 Education and Counseling, Volume 99, Issue 10,2016, Pages 1657-1662, ISSN 0738-  
263 3991.<https://doi.org/10.1016/j.pec.2016.04.010>.

## 264 **Limitation**

265           The limitation of the study is the reliance on self-reported data, which may be subject  
266 to recall bias and social desirability bias. Future research could consider using objective  
267 measures, such as medical records, to validate self-reported prevalence of Schistosomiasis.  
268 The duration of the health education was also limited due to the nature of occupation of the  
269 respondents who were farmers who needed to go to their various farms and the insecurity  
270 issues peculiar with the study location.

## 271 **Declarations**

### 272 ***Ethical approval***

273           Ethical approval was obtained from Research Ethics Committee of Ministry of  
274 Health, Bauchi State and Research Ethics Committee of Adeleke University, Ede. Informed  
275 consent was also obtained from participants after providing them with detailed information  
276 about the study's purpose, the procedures involved, the potential risks and benefits, and their  
277 rights as participants. Confidentiality was strictly maintained throughout the study. All  
278 participant data were anonymized and stored securely, accessible only to the research team.  
279 Identifiers were removed or coded to prevent the identification of individual participants in  
280 any reports or publications resulting from the research.

### 281 ***Consent for publication***

282 Not applicable

### 283 ***Availability of data and material***

284 The data for this study is available on reasonable request from the corresponding author.

285 ***Funding***

286 The study was funded by the authors

287 ***Competing interests***

288 The authors know no competing interest for this study.

289 ***Authors' contribution***

290 Sunday Charles Adeyemo- Study design, data collection and analysis, Gbadebo Jimoh

291 Oyedeji- Study design and training of health educators, James Atolagbe- Supervision,

292 Oladunni Opeyemi- Study design and supervision, Sunday Olanrewaju- Ethical compliance,

293 Calistus Akinleye- Study design, Funsho Olagunju- Data analysis, Eniola Dorcas Olabode-

294 Data Analysis and manuscript, Abdulwaris Salisu Maleka- Data collection

## Comparison between pre-intervention and post-intervention knowledge about Schistosomiasis prevention and control

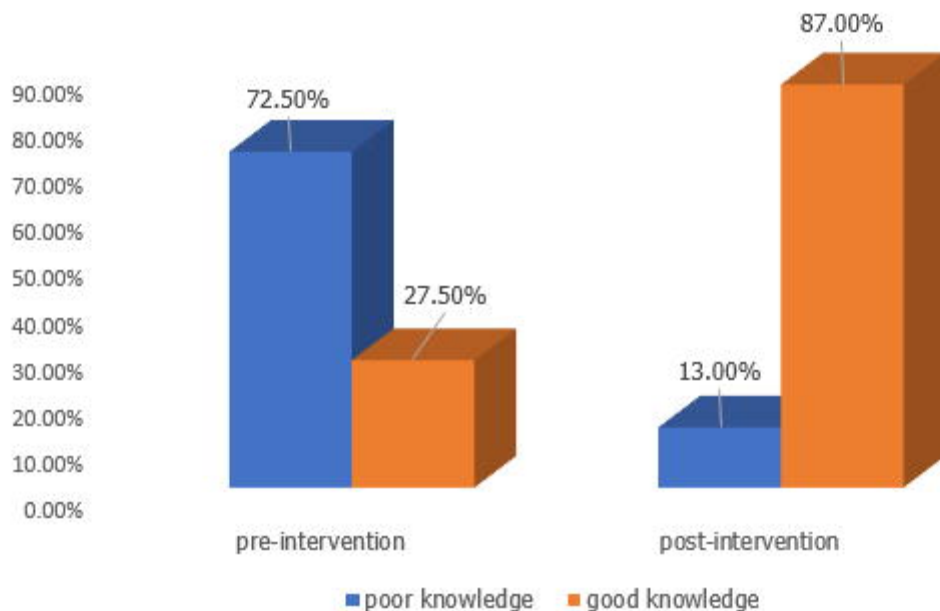

## Comparison of the prevalence of Schistosomiasis before and after intervention

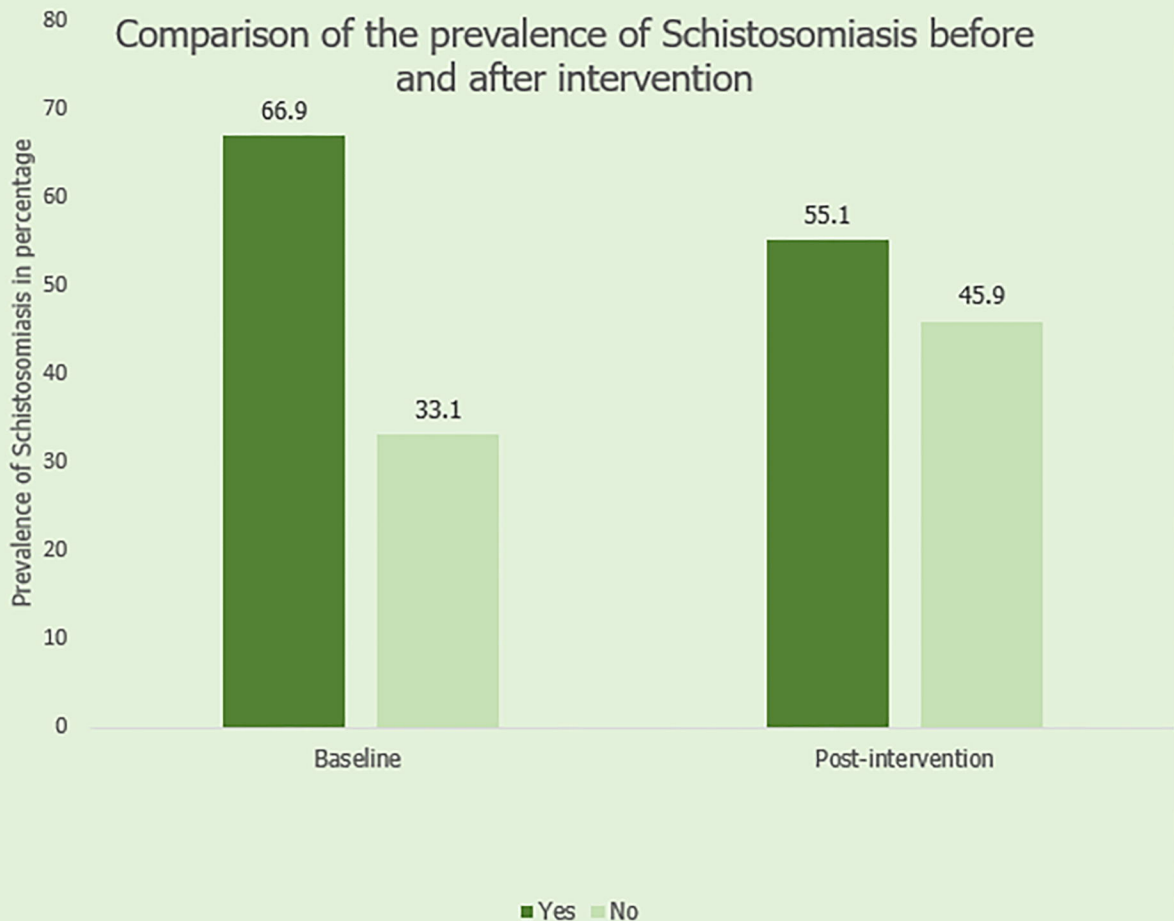

Source: https://medrxiv.org/content/10.1101/2024.07.11.24310273.full.pdf
